# Supplementary material for: 離婚と再婚における親子関係 (特集 親子関係のいまとこれから)
Source: Royal Society of Chemistry journal article supplement (doi:10.1039/d2cp04637g), 1997-10-01
Supplement: d2cp04637g1.pdf [file d2cp04637g1.pdf]

## Supplementary material

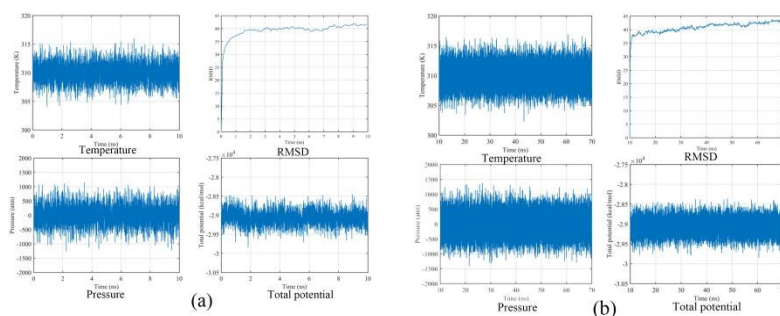

**Fig. S1.** (a) 0ns-10ns, (b) 10ns-70ns phospholipid membrane equilibrium. Both (a) and (b) fluctuated in the same range.

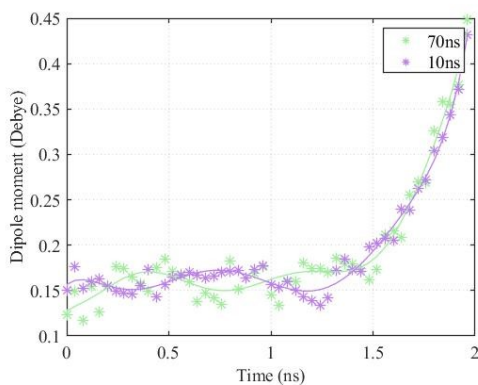

**Fig. S2.** The 10ns represented the simulation of applying 2ns pulse after the production time reached 10ns. The 70ns represented the simulation of production time reached 70ns. The dipole moment values were the average values taken after several simulations.

**Tab. S1.** The statistical parameters of 1ns interval

|               | $t_{ep}$<br>(ns) | IDM<br>(debye) | SIP | SIW | EIP | EIW | $t_{rep}$<br>(ns) | NIDM<br>(debye) |
|---------------|------------------|----------------|-----|-----|-----|-----|-------------------|-----------------|
| Destabilizing | 1.776            | 0.2754         | 8   | 172 | 1   | 14  | 0.39              | 0.1389          |
|               | 1.900            | 0.1427         | 3   | 49  | 1   | 18  | 0.50              | 0.1297          |
|               | 1.660            | 0.4889         | 9   | 176 | 3   | 42  | 0.04              | 0.1672          |
|               | 1.794            | 0.2895         | 9   | 126 | 1   | 36  | 0.002             | 0.1318          |
| Retaining     | 1.000            | 0.4021         | 5   | 138 | 4   | 62  |                   | 0.2006          |
|               | 1.750            | 0.3816         | 13  | 212 | 6   | 116 |                   | 0.2302          |
|               | 1.780            | 0.4157         | 7   | 87  | 3   | 55  |                   | 0.1176          |
|               | 1.400            | 0.7285         | 12  | 360 | 7   | 158 |                   | 0.2190          |
|               | 1.716            | 0.4543         | 8   | 142 | 2   | 57  |                   | 0.1578          |
|               | 1.760            | 0.5048         | 7   | 144 | 3   | 61  |                   | 0.1250          |
|               | 1.640            | 0.4877         | 11  | 225 | 5   | 116 |                   | 0.0774          |
|               | 1.600            | 0.6245         | 9   | 252 | 5   | 87  |                   | 0.1274          |

Note: In the table, SIP is the  $P_N$  at the beginning of the interval, SIW is the  $W_N$  at the beginning of the interval, EIP is the  $P_N$  at the end of the interval, and EIW is the  $W_N$  at the end of the interval, NIDM is the IDM of phospholipid membrane at the beginning of negative pulse. The value of  $P_N$  is too small relative to  $W_N$ , so it is used as the amplitude reference data.

**Tab. S2.** The statistical parameters of 5ns interval

|               | $t_{ep}$<br>(ns) | IDM<br>(debye) | SIP | SIW | EIP | EIW | $t_{rep}$<br>(ns) | NIDM<br>(debye) |
|---------------|------------------|----------------|-----|-----|-----|-----|-------------------|-----------------|
| Resealing     | 1.760            | 0.2181         | 3   | 75  | 0   | 1   | 0.39              | 0.1445          |
|               | 1.940            | 0.1699         | 5   | 63  | 0   | 5   | 0.50              | 0.1414          |
| Destabilizing | 1.610            | 0.3023         | 3   | 82  | 2   | 56  | 0.04              | 0.1295          |
|               | 1.600            | 0.3618         | 6   | 111 | 4   | 30  | 0.002             | 0.1940          |
|               | 1.600            | 0.5675         | 7   | 194 | 4   | 51  |                   | 0.1464          |
| Retaining     | 1.760            | 0.3120         | 9   | 124 | 3   | 52  |                   | 0.1165          |
|               | 1.300            | 0.9913         | 16  | 397 | 11  | 178 |                   | 0.0200          |
|               | 1.240            | 0.8011         | 16  | 334 | 7   | 74  |                   | 0.0494          |
|               | 1.080            | 1.2115         | 13  | 384 | 10  | 164 |                   | 0.2093          |
|               | 1.200            | 1.1105         | 18  | 425 | 16  | 241 |                   | 0.1537          |
|               | 1.180            | 0.6478         | 14  | 252 | 5   | 54  |                   | 0.1753          |
|               | 1.700            | 0.4896         | 9   | 133 | 4   | 56  |                   | 0.1168          |

**Tab. S3.** The statistical parameters of 10ns interval

|               | $t_{ep}$<br>(ns) | IDM<br>(debye) | SIP | SIW | EIP | EIW | $t_{rep}$<br>(ns) | NIDM<br>(debye) |
|---------------|------------------|----------------|-----|-----|-----|-----|-------------------|-----------------|
| Resealing     | 1.500            | 0.6198         | 16  | 311 | 0   | 6   | 1.250             | 0.0917          |
|               | 1.840            | 0.2829         | 3   | 96  | 0   | 14  | 1.794             | 0.0399          |
|               | 1.940            | 0.1699         | 4   | 84  | 0   | 6   | -                 | 0.1124          |
|               | 1.768            | 0.3112         | 8   | 83  | 0   | 7   | -                 | 0.0696          |
|               | 1.774            | 0.3106         | 2   | 259 | 0   | 16  | -                 | 0.1215          |
|               | 1.700            | 0.4293         | 10  | 145 | 0   | 1   | 1.870             | 0.1364          |
|               | 1.780            | 0.3052         | 3   | 78  | 0   | 3   | 1.500             | 0.1014          |
|               | 1.760            | 0.4757         | 10  | 215 | 0   | 12  | -                 | 0.0857          |
| Destabilizing | 1.760            | 0.3120         | 14  | 128 | 4   | 52  | 0.060             | 0.0456          |
| Retaining     | 1.278            | 0.6660         | 14  | 350 | 7   | 107 |                   | 0.1702          |
|               | 1.460            | 0.6864         | 10  | 249 | 4   | 54  |                   | 0.1333          |
|               | 1.300            | 0.7017         | 11  | 381 | 7   | 72  |                   | 0.1741          |

Note: The phospholipid membranes did not produce EP after applying negative pulses to some simulations, denoted by -.
